# Supplementary material
Source: PubMed Central journal article supplement (PMC4787696)
Supplement: lomc649558.wt1_default.pdf [file lomc649558.wt1_default.pdf]

**Web table A Baseline demographic characteristics by cluster group**

| Cluster | n  | Age yrs (SD) | BMI (SD)    | Steps /day SD | Met-mins /wk SD | Energy intake (kJ) SD | Income low <40K | Income mod 40-80 | Income high >80K | Education Yr 12 | Education Trade | Education University | Full-time work | Part-time work | No work |
|---------|----|--------------|-------------|---------------|-----------------|-----------------------|-----------------|------------------|------------------|-----------------|-----------------|----------------------|----------------|----------------|---------|
| 1       | 40 | 39.7 (4.2)   | 27.5 (5.4)  | 10274 (3235)  | 1861 (2092)     | 6488 (1771)           | 43.7            | 18.7             | 17.2             | 27.5            | 42.5            | 30                   | 7.5            | 50.0           | 42.5    |
| 2       | 34 | 40.2 (3.5)   | 26.7 (4.13) | 9142 (3978)   | 1710 (1623)     | 6187 (1956)           | 44.8            | 13.8             | 41.4             | 18.2            | 36.4            | 45.4                 | 6.0            | 66.7           | 27.3    |
| 3       | 14 | 42.0 (3.7)   | 28.7 (4.8)  | 8106 (2903)   | 465 (463)       | 6829 (3037)           | 50.0            | 16.7             | 33.3             | 15.4            | 69.2            | 15.4                 | 7.7            | 46.1           | 46.1    |
| 4       | 19 | 40.5 (6.6)   | 27.9 (4.2)  | 10313 (4661)  | 1391 (1149)     | 6737 (1644)           | 53.8            | 7.7              | 38.5             | 35.3            | 29.4            | 35.3                 | 0              | 47.1           | 52.9    |
| 5       | 14 | 41.6 (4.0)   | 25.2 (2.9)  | 8868 (2549)   | 1266 (1304)     | 6439 (1874)           | 50.0            | 40.0             | 10.0             | 28.6            | 50.0            | 21.4                 | 0              | 42.8           | 57.1    |
| 6       | 29 | 40.3 (5.5)   | 28.7 (7.2)  | 8420 (4016)   | 1890 (1470)     | 6709 (2165)           | 33.4            | 29.1             | 37.5             | 24.1            | 51.7            | 24.1                 | 6.9            | 44.8           | 48.2    |
| 7       | 19 | 39.9 (4.9)   | 28.9 (6.9)  | 9234 (3086)   | 1463 (1367)     | 7720 (2813)           | 23.4            | 58.8             | 17.6             | 57.9            | 15.8            | 26.3                 | 5.26           | 63.1           | 31.5    |
| 8       | 19 | 39.9 (5.8)   | 27.4 (4.7)  | 9098 (2495)   | 1231 (1327)     | 7552 (3275)           | 52.8            | 11.7             | 35.2             | 31.5            | 57.8            | 10.5                 | 9.1            | 33.3           | 55.5    |
| 9       | 18 | 40.3 (4.1)   | 28.3 (5.9)  | 7679 (1997)   | 2124 (2027)     | 6310 (2889)           | 50.0            | 14.3             | 35.7             | 5.8             | 58.8            | 35.3                 | 5.8            | 76.4           | 17.6    |
| 10      | 22 | 40.6 (5.4)   | 27.1 (5.3)  | 8737 (3712)   | 1169 (778)      | 7270 (2436)           | 47.0            | 29.4             | 23.5             | 5.5             | 55.6            | 38.9                 | 11.1           | 61.1           | 27.8    |
| 11      | 14 | 39.9 (4.7)   | 29.0 (6.3)  | 11769 (3719)  | 1582 (1149)     | 6815 (1881)           | 66.7            | 25.0             | 8.3              | 41.7            | 41.7            | 16.7                 | 0              | 41.6           | 58.3    |
| 12      | 8  | 42.8 (4.9)   | 29.8 (4.2)  | 8971 (409)    | 1843 (1745)     | 6633 (1598)           | 60              | 0.0              | 40.0             | 14.3            | 57.1            | 28.6                 | 0              | 71.4           | 28.5    |
