# Supplementary material
Source: PubMed Central journal article supplement (PMC4787696)
Supplement: lomc649558.wt2_default.pdf [file lomc649558.wt2_default.pdf]

**Web table B Summary of missing data at baseline and at 12 months**

|                                    | Data missing at baseline (n (%)) | Data missing at 12 months (n (%)) |
|------------------------------------|----------------------------------|-----------------------------------|
| Weight                             | 0                                | 35 (14)                           |
| BMI                                | 0                                | 35 (14)                           |
| Hip                                | 0                                | 36 (14)                           |
| Waist                              | 0                                | 36 (14)                           |
| Height *                           | 0                                | —                                 |
| Age*                               | 9 (4)                            | —                                 |
| Income*                            | 48 (19)                          | —                                 |
| Education*                         | 12 (5)                           | —                                 |
| Energy                             | 34 (14)                          | 68 (27)                           |
| Total fat                          | 29 (12)                          | 64 (26)                           |
| Energy expenditure (MET-mins/week) | 72 (29)                          | 61 (24)                           |
| Pedometer steps a day              | 79 (32)                          | 93 (37)                           |
| Low density lipoprotein            | 75 (30)                          | 120 (48)                          |
| High density lipoprotein           | 75 (30)                          | 120 (48)                          |
| Triglyceride                       | 75 (30)                          | 120 (48)                          |
| Total cholesterol                  | 76 (30)                          | 120 (48)                          |

\*Measured at baseline only.

Reasons for missing data at baseline include participants giving a “prefer not to answer” option for income; incorrectly completed food frequency and IPAQ activity questionnaires; failure to use pedometers correctly; failure to attend for blood tests.
